# Supplementary material
Source: publisher figshare collection journal article supplement (https://acs.figshare.com/ndownloader/files/25205539)
Supplement: Supplementary file 1 [file 25205539]

## Supporting Information

### **Pseudocapacitive Energy Storage and Electrocatalytic Hydrogen-Evolution Activity of Defect-Ordered Perovskites $\text{Sr}_x\text{Ca}_{3-x}\text{GaMn}_2\text{O}_8$ ( $x = 0$ and 1)**

Surendra B. Karki<sup>1</sup>, Farshid Ramezanipour<sup>1,\*</sup>

<sup>1</sup>Department of Chemistry, University of Louisville, Louisville, Kentucky 40292, USA

\*Corresponding author. Email: [farshid.ramezanipour@louisville.edu](mailto:farshid.ramezanipour@louisville.edu), Phone: +1(502) 852-7061

Number of pages: 4

Number of figures: 3

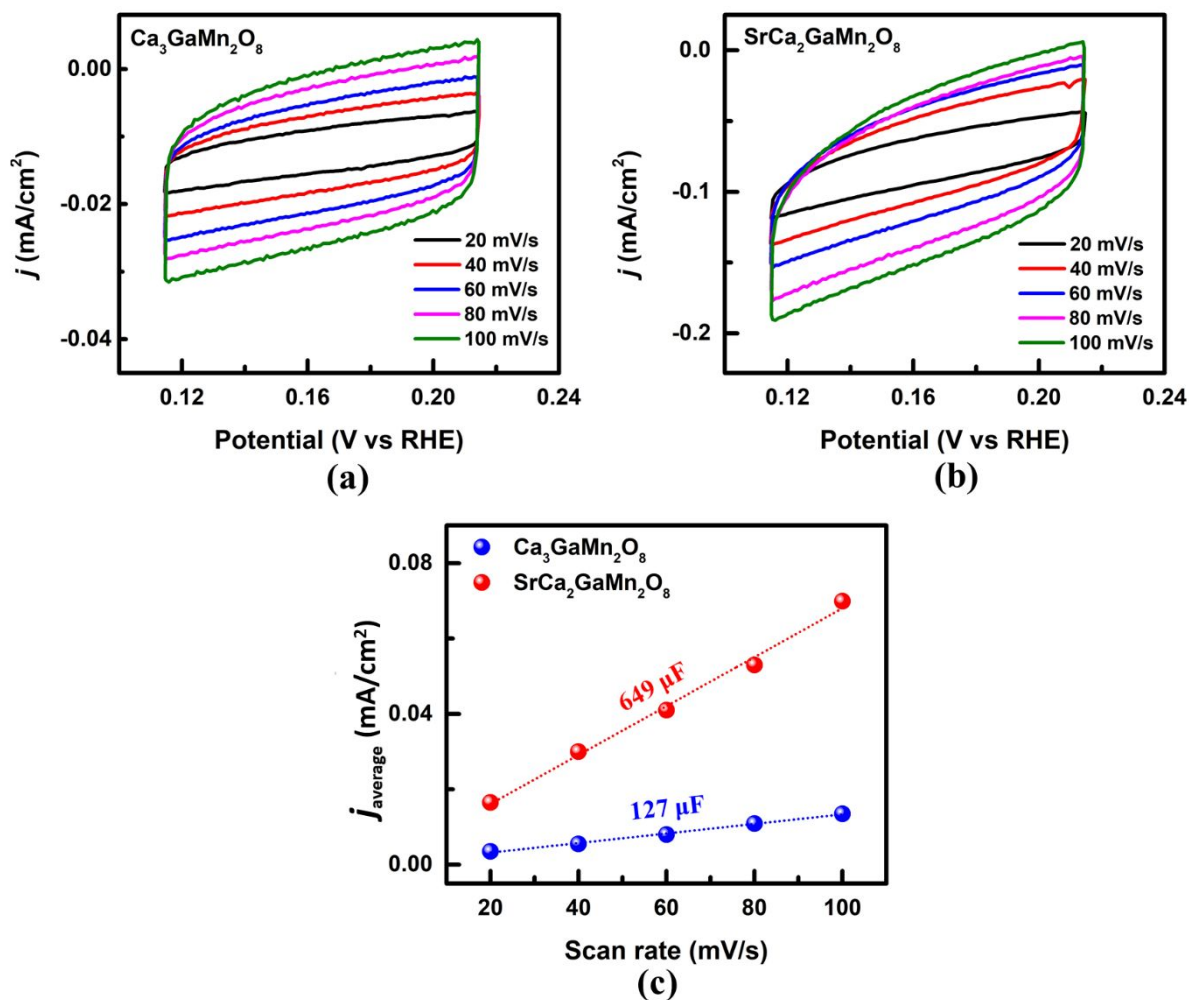

Figure S1. (a) and (b) Cyclic voltammety data in non-faradic region for the two compounds. (c) Plot of  $j_{\text{average}}$  versus scan rate ( $\nu$ ). Here,  $j_{\text{average}}$  is the average of  $j_{\text{anodic}}$  and  $j_{\text{cathodic}}$  absolute values at the middle potential of the CV at each scan rate. The  $C_{\text{dl}}$  value is often taken as a measure of electrochemically active surface area (ECSA),<sup>1</sup> and is obtained from the slope of  $j_{\text{average}}$  versus  $\nu$  graph according to the equation  $C_{\text{dl}} = j_{\text{average}}/\nu$ .<sup>2-3</sup>

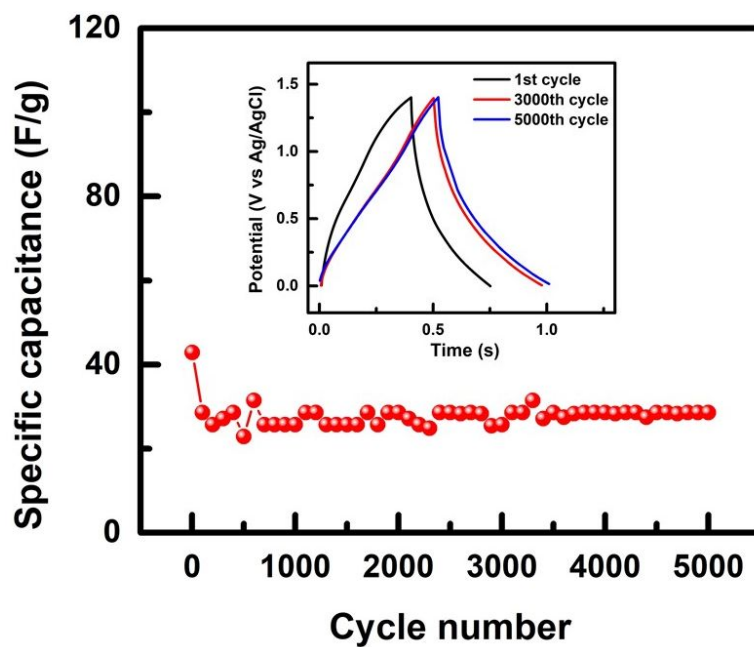

Figure S2. Specific capacitance obtained from 5000 GCD cycles for  $\text{Ca}_3\text{GaMn}_2\text{O}_8$  at 10 A/g, indicating high stability. The inset shows the 1<sup>st</sup>, 3000<sup>th</sup>, and 5000<sup>th</sup> GCD cycles.

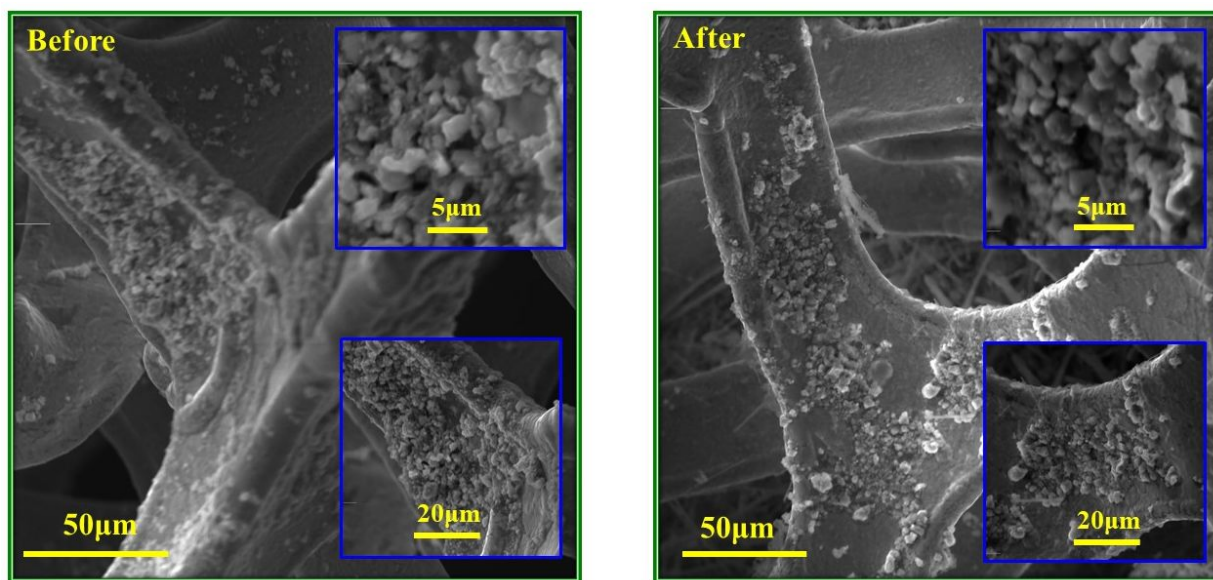

Figure S3. Scanning electron microscopy (SEM) images of  $\text{Ca}_3\text{GaMn}_2\text{O}_8$  particles on nickel foam before and after 5000 GCD cycles.

1. Pan, Y.; Chen, Y.; Li, X.; Liu, Y.; Liu, C., Nanostructured nickel sulfides: phase evolution, characterization and electrocatalytic properties for the hydrogen evolution reaction. *RSC Adv.* **2015**, *5*, 104740-104749.
2. Hona, R. K.; Ramezanipour, F., Remarkable Oxygen-Evolution Activity of a Perovskite Oxide from the  $\text{Ca}_{2-x}\text{Sr}_x\text{Fe}_2\text{O}_{6-\delta}$  Series. *Angew. Chem.* **2019**, *58*, 2060-2063.
3. Hona, R. K.; Karki, S. B.; Ramezanipour, F., Oxide Electrocatalysts Based on Earth-Abundant Metals for Both Hydrogen- and Oxygen-Evolution Reactions. *ACS Sustainable Chem. Eng.* **2020**, *8*, 11549-11557.
